# Supplementary material
Source: PubMed Central journal article supplement (PMC7402446)
Supplement: neurintsurg-2020-016349supp001.pdf [file neurintsurg-2020-016349supp001.pdf]

## Online Appendix

### Original survey questions

1. Are you as Neurointerventionalist coming to the hospital every day?
  - Yes, mainly doing neurointerventions
  - Yes, mainly doing my other typical work (admin, diagnostic readings ...)
  - Yes, redeployed to function in another role in the hospital (**free text**)
  - No I am at home, just coming in for emergencies
2. Have you or any of your team contracted COVID-19 in 2020?
  - Yes
  - No
3. Are you able to provide the usual service for emergencies (Stroke, SAH)?
  - Yes, completely
  - Yes, but with limited team / hospital resources
  - No, we are struggling heavily
  - Neurointerventional service is suspended
4. What kind of personal protection do you use for COVID+ or suspected cases?
  - Dedicated cath labs for suspected and or COVID+ cases
  - Powered, air-purifying respirator (PAPR)
  - N95 mask
  - Regular face mask (and face shield)
  - Video consultations in your own hospital
  - Video consultations in other hospitals
5. Have you noticed a reduction in emergency cases?
  - Yes, reduced hemorrhagic cases
  - Yes, reduced ischemic stroke Cases
  - Yes, both reduced hemorrhagic cases and ischemic stroke cases.
  - No, we are maintaining our emergency case load.
  - No, there is an increase in our emergency case load.
6. How do you manage anesthesia in your emergency procedures?
  - Intubate all patients, as per routine
  - Intubate all confirmed COVID+
  - Intubate all suspected and confirmed COVID+
  - No intubation, unless airway compromised
7. How do you deal with non-emergency procedures?
  - Regular schedule with elective cases (e.g. incidental aneurysms)
  - Limited schedule with <50% elective cases (e.g. incidental aneurysms)
  - Urgent, but not emergency cases are done (e.g. symptomatic carotids, <30 days)
  - We stopped non-emergency procedures completely

8. When do you expect to re-commence to full capacity with non-emergency procedures?
  - < 3 months
  - 3 – 6 months
  - >6 months
  
9. Which methods of remote support would be suitable to you? (tick all that are relevant).
  - Case discussion forum on the ESMINT / SILAN SNIS / SVIN / WFITN website
  - Direct communication to ESMINT / SILAN SNIS / SVIN / WFITN mentors
  - 24/7 access to video streaming from angio for live discussion of procedures with team members quarantined at home, and/or mentors externally
  - Other (please give more details - free text)
  
10. Is there a COVID-19 learning you wish to share with the ESMINT / SILAN SNIS / SVIN / WFITN community?
  - Free text
  
11. Please type in the country you work in
  - Free text
  
12. Would you be willing to be contacted by ESMINT / SILAN SNIS / SVIN / WFITN to share your experiences and gain more information? Please provide your email address here (free text).
